# Supplementary material for: Unusual symmetry breaking in high-temperature enantiomeric ferroelectrics with large spontaneous polarization
Source: Royal Society of Chemistry journal article supplement (doi:10.1039/d2dt00592a), 2022-01-01
Supplement: d2dt00592a1.pdf [file d2dt00592a1.pdf]

## Electronic Supplementary Information

### Unusually Symmetry Breaking from **1** to **2** in a High-Temperature Enantiomeric Ferroelectrics with Large Spontaneous Polarization

Yu-Kong Li, Ting-Ting Ying, Hao Zhang, Yun-Zhi Tang,\* Yu-Hui Tan,\* Fang Xin Wang, Ming Yang Wan

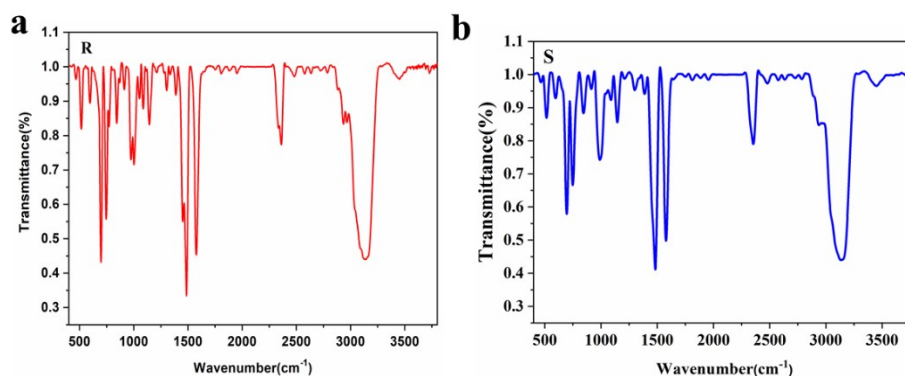

Fig. S1. Infrared spectrum of compound **1** (a) and **2** (b)

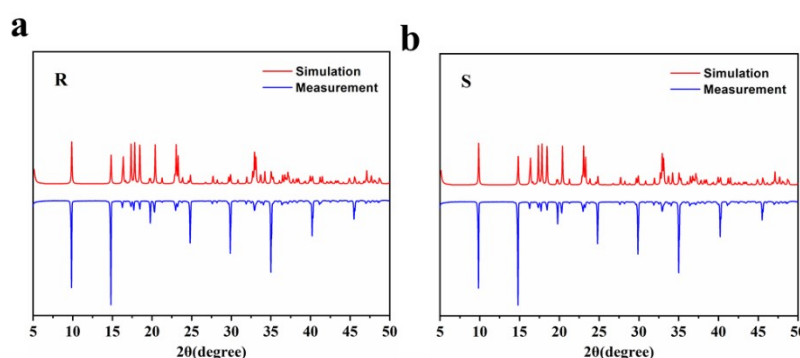

Fig. S2. The powder XRD of **1** (a) and **2** (b) with the simulated one in red and the measurement in blue.

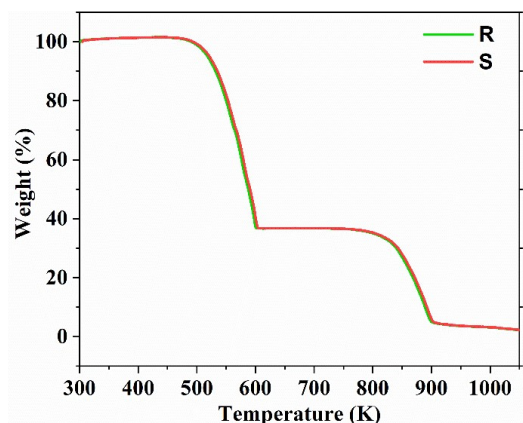

Fig. S3. Thermogravimetric analysis (TGA) curves of **1** and **2**.

Table S1. Crystal data and structure refinements for [(R)-β-MPA]<sub>2</sub>CdCl<sub>4</sub> and [(S)-β-MPA]<sub>2</sub>CdCl<sub>4</sub> at

various temperatures.

| Compound                    | [( <i>R</i> )- $\beta$ -MPA] <sub>2</sub> CdCl <sub>4</sub> |               | [( <i>S</i> )- $\beta$ -MPA] <sub>2</sub> CdCl <sub>4</sub> |               |
|-----------------------------|-------------------------------------------------------------|---------------|-------------------------------------------------------------|---------------|
|                             | 300 K                                                       | 360 K         | 300 K                                                       | 360 K         |
| Temperature                 | 300 K                                                       | 360 K         | 300 K                                                       | 360 K         |
| Crystal system              | Monoclinic                                                  | Triclinic     | Monoclinic                                                  | Triclinic     |
| Space group                 | <i>C</i> 2                                                  | <i>P</i> 1    | <i>C</i> 2                                                  | <i>P</i> 1    |
| <i>a, b, c</i> (Å)          | 35.8807(16)                                                 | 7.7844(1)     | 35.910(7)                                                   | 7.7817(1)     |
|                             | 5.4904(2)                                                   | 7.8052(1)     | 5.4715(9)                                                   | 7.7972(1)     |
|                             | 5.4314(2)                                                   | 18.2463(2)    | 5.4511(10)                                                  | 18.2458(3)    |
| $\alpha, \beta, \gamma$ (°) | 90                                                          | 94.189(1)     | 90                                                          | 94.151(1)     |
|                             | 94.076(1)                                                   | 97.931(1)     | 94.108(5)                                                   | 97.976(1)     |
|                             | 90                                                          | 90.917(1)     | 90                                                          | 90.842(1)     |
| Volume /Å <sup>3</sup>      | 1067.28(7)                                                  | 1094.70(2)    | 1068.3(3)                                                   | 1093.14(3)    |
| <i>Z</i>                    | 2                                                           | 1             | 2                                                           | 1             |
| Density/g.cm <sup>-3</sup>  | 1.639                                                       | 1.598         | 1.637                                                       | 1.597         |
| <i>R</i> <sub>1</sub>       | 0.0137(2348)                                                | 0.0327(9463)  | 0.0754(2374)                                                | 0.0400(9076)  |
| <i>wR</i> <sub>2</sub>      | 0.0338(2353)                                                | 0.0819(11780) | 0.2003(2377)                                                | 0.1114(11847) |
| GOF                         | 1.084                                                       | 1.070         | 1.126                                                       | 1.081         |

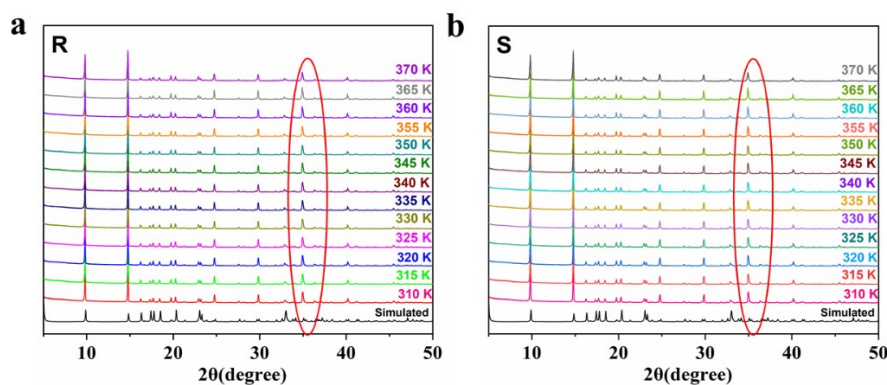

**Fig. S4.** Variable-temperature PXRD patterns of **1**(a) and **2**(b). The Ellipsoid box represents the slight change ranges of the diffraction peaks.

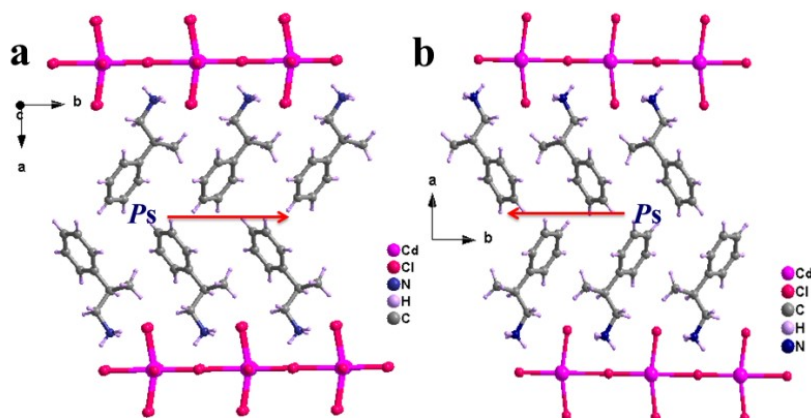

**Fig. S5.** Packing view of crystal structure of compounds **1**(a) and **2**(b), and the red arrow indicates the polarization direction.

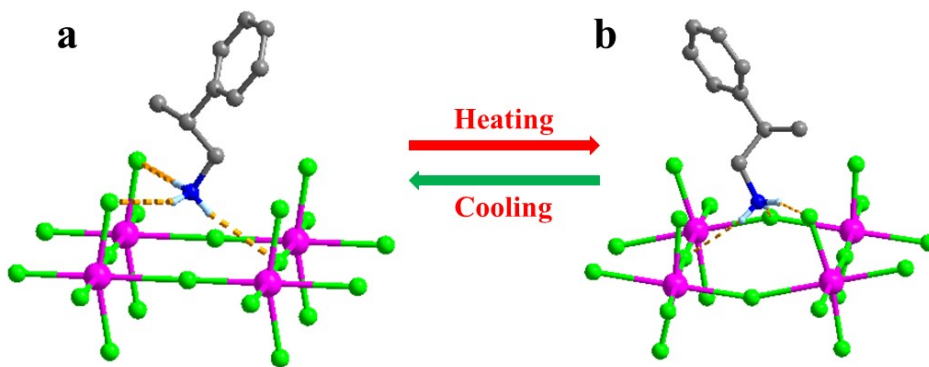

Fig. S6. Molecular structures of **1** at 300 K (a) and 360 K (b).

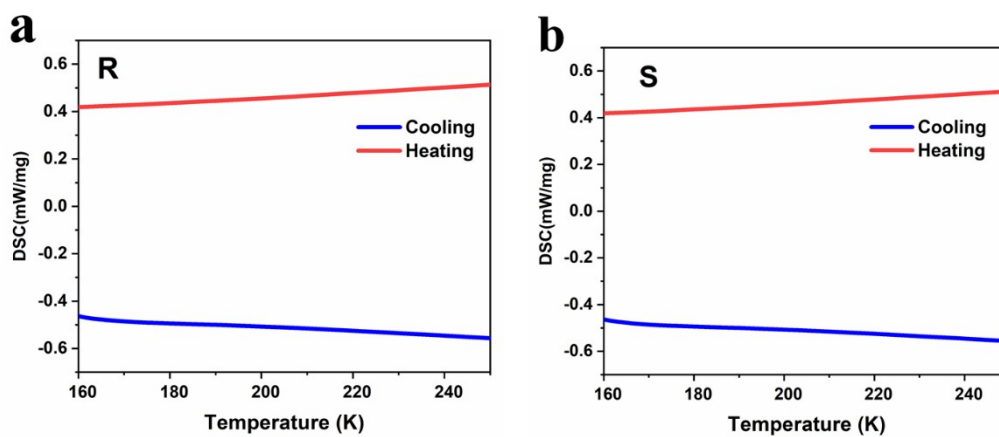

Fig. S7. DSC curves of compound **1** and **2** at 160-250K.

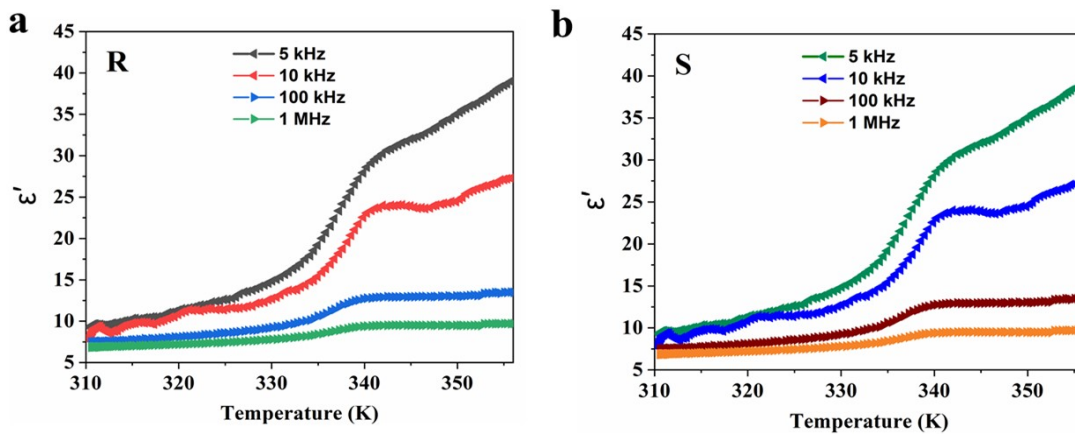

Fig. S8. The frequency dependence of the dielectric of compounds **1** (a) and **2** (b) during heating.

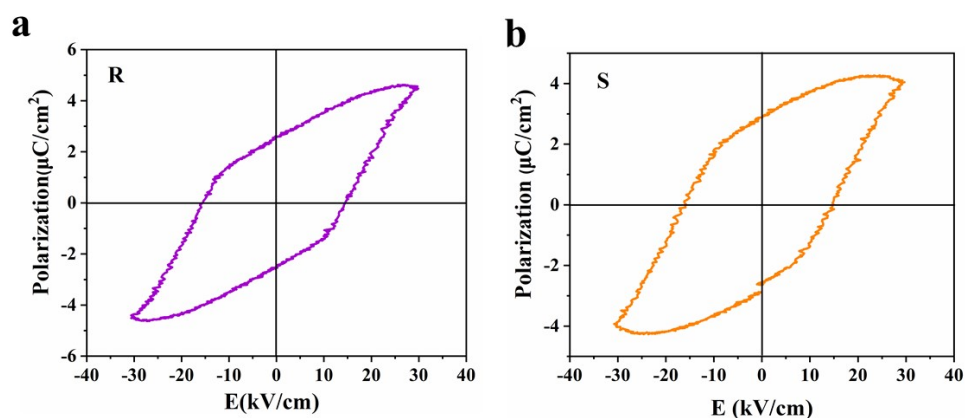

**Fig. S9.** Polarization hysteresis loops at 370 K of compounds **1** (a) and **2** (b).

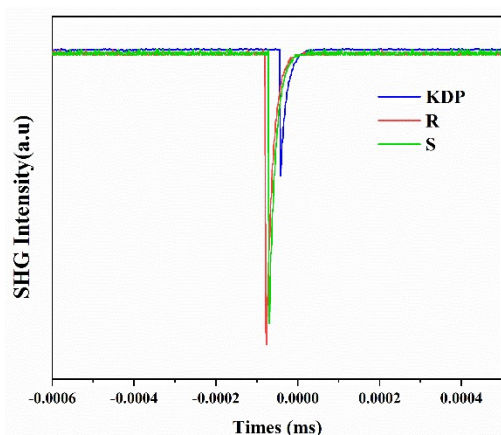

**Fig. S10.** SHG signal intensity of compounds **1**, **2** and KDP at room temperature.

**Table S2.** Some related values of ferroelectric properties

|                                                                           | $T_c$ (K) | $P_s$ ( $\mu\text{C}\cdot\text{cm}^{-2}$ ) |
|---------------------------------------------------------------------------|-----------|--------------------------------------------|
| Compounds <b>1</b> and <b>2</b>                                           | 343       | 4.65/4.67                                  |
| [(R)-N-(1-phenylethyl)ethane-1,2-diaminium]PbI <sub>4</sub> <sup>38</sup> | 378       | 0.15                                       |
| (R)-3-quinuclidinol <sup>39</sup>                                         | 381       | 7                                          |
| (S)-3-F-(pyrrolidinium)CdCl <sub>3</sub> <sup>13</sup>                    | 240       | 5.79                                       |
| (R)-3-F-(pyrrolidinium)CdCl <sub>3</sub> <sup>13</sup>                    | 240       | 5.63                                       |
| (S)-(N,N-dimethyl-3-fluoropyrrolidinium)iodide <sup>40</sup>              | 470       | 0.4                                        |
| (R)-(N,N-dimethyl-3-fluoropyrrolidinium)iodide <sup>40</sup>              | 470       | 0.48                                       |

**Table S3** Hydrogen bond geometry ( $\text{\AA}$ , degree) for **1** at 300 K and 360 K

|       | D-H...A      | H...A | D...A    | ∠D-H...A |
|-------|--------------|-------|----------|----------|
| 300 K | N1-H1A...C11 | 2.73  | 3.562(9) | 176      |
|       | N1-H1B...C12 | 2.66  | 3.510(9) | 156      |
|       | N1-H1C...C12 | 2.57  | 3.466(9) | 158      |
| 360 K | N3-H3A...C8  | 2.80  | 3.46(10) | 131      |
|       | N3-H3B...C11 | 2.41  | 3.27(10) | 165      |
|       | N3-H3C...C15 | 3.11  | 3.58(10) | 113      |
